# Supplementary material
Source: MDPI journal article supplement (https://www.mdpi.com/2076-3417/13/6/3755)
Supplement: s1 [file s1]

# Commercial Ebullated Bed Vacuum Residue Hydrocracking Performance Improvement during Processing Difficult Feeds

Borislav Enchev Georgiev <sup>1,2</sup>, Dicho Stoyanov Stratiev <sup>1,2,\*</sup>, Georgy Stoilov Argirov <sup>1</sup>, Angel Nedelchev <sup>1</sup>, Rosen Dinkov <sup>1</sup>, Ivelina Kostova Shishkova <sup>1</sup>, Mihail Ivanov <sup>1</sup>, Krassimir Atanassov <sup>2</sup>, Simeon Ribagin <sup>2,3</sup>, Georgi NikolovPalichev <sup>2</sup>, Svetoslav Nenov <sup>4</sup>, Sotir Sotirov <sup>3</sup>, Evdokia Sotirova<sup>3</sup>, Dimitar Pilev <sup>4</sup> and Danail Dichev Stratiev <sup>2</sup>

<sup>1</sup> LUKOIL Neftohim Burgas, 8104 Burgas, Bulgaria

<sup>2</sup> Institute of Biophysics and Biomedical Engineering, Bulgarian Academy of Sciences, Georgi Bonchev 105, 1113 Sofia, Bulgaria

<sup>3</sup> Intelligent Systems Laboratory, University Prof. Dr. Assen Zlatarov, Professor Yakimov 1, 8010 Burgas, Bulgaria

<sup>4</sup> Department of Mathematics, University of Chemical Technology and Metallurgy, Kliment Ohridski 8, 1756 Sofia, Bulgaria

\* Correspondence: stratiev.dicho@neftochim.bg

**Table S1.** Properties of crude oils under study.

| Crude origin                      |                    | Urals | Basrah H | LSCO  |
|-----------------------------------|--------------------|-------|----------|-------|
| Crude density at 15 °C            | g /cm <sup>3</sup> | 0,877 | 0,905    | 0,854 |
| Crude sulphur                     | wt. %              | 1,53  | 3,86     | 0,57  |
| Crude kin. Viscosity at 40°C      | mm <sup>2</sup> /s | 12,6  | 37,2     | 10,8  |
| Crude Saturates                   | wt. %              | 58,4  | 46,5     | 62,3  |
| Crude Aromatics                   | wt. %              | 35,2  | 38,7     | 31,4  |
| Crude Resins                      | wt. %              | 2,6   | 5,1      | 3,1   |
| Crude Aspaltenes(C <sub>7</sub> ) | wt. %              | 3,8   | 9,7      | 3,2   |
| Crude Aspaltenes(C <sub>5</sub> ) | wt. %              | 6,3   | 14,8     | 6,3   |
| IBP-180°C                         | TBP, wt. %         | 15,0  | 15,7     | 20,0  |
| 180-240°C                         | TBP, wt. %         | 8,7   | 7,8      | 9,1   |
| 240-360°C                         | TBP, wt. %         | 21,0  | 17,7     | 23,1  |
| 360-550°C                         | TBP, wt. %         | 30,3  | 25,9     | 29,6  |
| >550°C                            | TBP, wt. %         | 23,9  | 31,9     | 17,3  |

**Table S2.** Different variables characterizing the ebullated bed vacuum residue hydrocracker performance to be evaluated by ICrA.

| H-Oil Net conversion, wt. % | HDM, % | LHSV, h <sup>-1</sup> | T-R1, °C | T-R2, °C | ATB TSE | R-1 ΔT, °C | R-2 ΔT, °C | Urals, wt. frac. | Sib Light, wt. frac. | Basrah Heavy, wt. frac. |
|-----------------------------|--------|-----------------------|----------|----------|---------|------------|------------|------------------|----------------------|-------------------------|
| 62,0                        | 39,4   | 0,14                  | 414      | 415      | 0,46    | 54         | 52         | 0,89             | 0,00                 | 0,06                    |
| 58,5                        | 62,8   | 0,17                  | 414      | 415      | 0,38    | 49         | 47         | 0,81             | 0,00                 | 0,18                    |
| 66,3                        | 58,3   | 0,17                  | 416      | 419      | 0,3     | 59         | 57         | 0,58             | 0,28                 | 0,15                    |
| 66,3                        | 79,7   | 0,19                  | 414      | 417      | 0,57    | 51         | 54         | 0,82             | 0,11                 | 0,06                    |
| 67,0                        | 58,2   | 0,18                  | 417      | 422      | 0,19    | 58         | 50         | 0,63             | 0,38                 | 0,00                    |
| 71,6                        | 79,4   | 0,17                  | 419      | 424      | 0,41    | 65         | 51         | 0,65             | 0,35                 | 0,00                    |
| 70,0                        | 74,6   | 0,17                  | 419      | 424      | 0,21    | 65         | 51         | 0,44             | 0,56                 | 0,00                    |
| 69,7                        | 77,7   | 0,18                  | 419      | 424      | 0,42    | 67         | 43         | 0,50             | 0,50                 | 0,00                    |
| 70,5                        | 80,4   | 0,17                  | 419      | 424      | 0,38    | 68         | 40         | 0,50             | 0,50                 | 0,00                    |
| 70,4                        | 82,1   | 0,17                  | 420      | 423      | 0,32    | 69         | 39         | 0,50             | 0,50                 | 0,00                    |
| 70,8                        | 82,0   | 0,18                  | 420      | 423      | 0,29    | 68         | 41         | 0,50             | 0,50                 | 0,00                    |
| 71,1                        | 85,3   | 0,17                  | 421,5    | 421,5    | 0,3     | 69,5       | 36,5       | 0,50             | 0,50                 | 0,00                    |
| 71,6                        | 82,0   | 0,17                  | 421,5    | 421,5    | 0,24    | 68,5       | 35,5       | 0,50             | 0,50                 | 0,00                    |
| 72,3                        | 82,1   | 0,17                  | 422,5    | 422,5    | 0,34    | 69,5       | 36,5       | 0,50             | 0,50                 | 0,00                    |
| 72,5                        | 84,6   | 0,17                  | 422,5    | 422,5    | 0,32    | 71,5       | 36,5       | 0,50             | 0,50                 | 0,00                    |
| 74,7                        | 88,3   | 0,17                  | 424,5    | 424,5    | 0,18    | 74,5       | 39,5       | 0,50             | 0,50                 | 0,00                    |
| 75,5                        | 87,1   | 0,17                  | 425      | 425      | 0,26    | 75         | 41         | 0,68             | 0,33                 | 0,00                    |
| 76,5                        | 89,0   | 0,18                  | 428      | 428      | 0,26    | 78         | 41         | 0,65             | 0,36                 | 0,00                    |
| 77,4                        | 89,5   | 0,18                  | 428      | 428      | 0,18    | 77         | 40         | 0,61             | 0,39                 | 0,00                    |
| 80,2                        | 94,8   | 0,18                  | 428      | 428      | 0,19    | 77         | 40         | 0,60             | 0,40                 | 0,00                    |
| 75,6                        | 90,0   | 0,18                  | 428      | 428      | 0,16    | 77         | 40         | 0,60             | 0,40                 | 0,00                    |
| 75,3                        | 88,8   | 0,19                  | 428      | 428      | 0,13    | 77         | 38         | 0,67             | 0,33                 | 0,00                    |
| 75,3                        | 88,8   | 0,19                  | 429      | 430      | 0,22    | 78         | 38         | 0,71             | 0,29                 | 0,00                    |
| 76,1                        | 85,7   | 0,19                  | 429      | 430      | 0,24    | 77         | 37         | 0,68             | 0,32                 | 0,00                    |
| 77,5                        | 87,2   | 0,19                  | 429      | 430      | 0,17    | 89         | 39         | 0,70             | 0,15                 | 0,15                    |
| 78,4                        | 85,1   | 0,19                  | 430      | 432      | 0,22    | 90         | 43         | 0,73             | 0,12                 | 0,15                    |
| 77,0                        | 85,2   | 0,19                  | 430      | 432      | 0,16    | 91         | 40         | 0,83             | 0,06                 | 0,11                    |
| 77,7                        | 82,7   | 0,19                  | 430      | 432      | 0,07    | 90         | 43         | 0,64             | 0,23                 | 0,13                    |

|      |      |      |     |     |      |    |    |      |      |      |
|------|------|------|-----|-----|------|----|----|------|------|------|
| 77,2 | 81,0 | 0,19 | 430 | 432 | 0,35 | 73 | 34 | 0,50 | 0,35 | 0,15 |
| 78,7 | 90,1 | 0,19 | 430 | 432 | 0,47 | 72 | 32 | 0,53 | 0,33 | 0,14 |
| 78,0 | 89,9 | 0,2  | 429 | 431 | 0,1  | 80 | 34 | 0,63 | 0,32 | 0,06 |
| 76,3 | 86,2 | 0,19 | 429 | 431 | 0,09 | 84 | 37 | 0,68 | 0,29 | 0,00 |
| 80,2 | 87,7 | 0,18 | 429 | 431 | 0,15 | 86 | 38 | 0,74 | 0,26 | 0,00 |
| 79,5 | 87,4 | 0,17 | 429 | 431 | 0,09 | 82 | 38 | 0,74 | 0,25 | 0,00 |
| 80,8 | 91,4 | 0,17 | 429 | 432 | 0,11 | 81 | 43 | 0,74 | 0,26 | 0,00 |
| 81,4 | 92,2 | 0,16 | 430 | 432 | 0,19 | 79 | 43 | 0,72 | 0,28 | 0,00 |
| 82,7 | 94,1 | 0,16 | 430 | 432 | 0,25 | 80 | 43 | 0,72 | 0,28 | 0,00 |
| 82,3 | 89,7 | 0,16 | 430 | 432 | 0,21 | 79 | 40 | 0,70 | 0,30 | 0,00 |
| 82,7 | 97,9 | 0,17 | 430 | 432 | 0,11 | 84 | 43 | 0,78 | 0,22 | 0,00 |

**Table S3.** Ebullated bed vacuum residue hydrocracker data for LHSV, reaction temperature (WABT), and net conversion.

| Nr | Date       | LHSV, hr-1 | WABT, °C | H-Oil net conversion (540°C+), wt. % |
|----|------------|------------|----------|--------------------------------------|
| 1  | 11.4.2022  | 0,139      | 414,5    | 62,0                                 |
| 2  | 20.4.2022  | 0,170      | 414,5    | 58,5                                 |
| 3  | 4.5.2022   | 0,170      | 417,5    | 66,3                                 |
| 4  | 11.5.2022  | 0,190      | 415,5    | 66,3                                 |
| 5  | 18.5.2022  | 0,180      | 419,5    | 66,95                                |
| 6  | 23.5.2022  | 0,170      | 421,5    | 71,6                                 |
| 7  | 26.5.2022  | 0,170      | 421,5    | 70                                   |
| 8  | 30.5.2022  | 0,180      | 421,5    | 69,7                                 |
| 9  | 1.6.2022   | 0,170      | 421,5    | 70,5                                 |
| 10 | 2.6.2022   | 0,170      | 421,5    | 70,4                                 |
| 11 | 6.6.2022   | 0,180      | 421,5    | 70,8                                 |
| 12 | 9.6.2022   | 0,170      | 421,5    | 71,1                                 |
| 13 | 13.6.2022  | 0,170      | 421,5    | 71,6                                 |
| 14 | 15.6.2022  | 0,170      | 422,5    | 72,3                                 |
| 15 | 16.6.2022  | 0,170      | 422,5    | 72,5                                 |
| 16 | 20.6.2022  | 0,170      | 424,5    | 74,7                                 |
| 17 | 27.6.2022  | 0,170      | 425      | 75,5                                 |
| 18 | 4.7.2022   | 0,180      | 428      | 76,5                                 |
| 19 | 11.7.2022  | 0,180      | 428      | 77,4                                 |
| 20 | 18.7.2022  | 0,180      | 428      | 80,2                                 |
| 21 | 25.7.2022  | 0,180      | 428      | 75,6                                 |
| 22 | 1.8.2022   | 0,190      | 428      | 75,3                                 |
| 23 | 8.8.2022   | 0,190      | 429,5    | 75,3                                 |
| 24 | 15.8.2022  | 0,190      | 429,5    | 76,1                                 |
| 25 | 22.8.2022  | 0,190      | 429,5    | 77,5                                 |
| 26 | 29.8.2022  | 0,190      | 431      | 78,4                                 |
| 27 | 5.9.2022   | 0,190      | 431      | 77,0                                 |
| 28 | 12.9.2022  | 0,190      | 431      | 77,7                                 |
| 29 | 19.9.2022  | 0,190      | 431      | 77,2                                 |
| 30 | 26.9.2022  | 0,190      | 431      | 78,7                                 |
| 31 | 3.10.2022  | 0,200      | 430      | 78,0                                 |
| 32 | 10.10.2022 | 0,190      | 430      | 76,3                                 |
| 33 | 17.10.2022 | 0,180      | 430      | 80,2                                 |
| 34 | 24.10.2022 | 0,170      | 430      | 79,5                                 |
| 35 | 31.10.2022 | 0,170      | 430,5    | 80,8                                 |
| 36 | 7.11.2022  | 0,165      | 431      | 81,4                                 |
| 37 | 14.11.2022 | 0,165      | 431      | 82,7                                 |
| 38 | 21.11.2022 | 0,164      | 431      | 82,3                                 |
| 39 | 28.11.2022 | 0,169      | 431      | 82,7                                 |
| 40 | 1.3.2023   | 0,21       | 430      | 72,5                                 |
| 41 | 1.11.2023  | 0,19       | 430      | 75,9                                 |
| 42 | 1.16.2023  | 0,20       | 430      | 76,7                                 |
| 43 |            | 0,223      | 411      | 54,7                                 |
| 44 |            | 0,245      | 414      | 56,1                                 |
| 45 |            | 0,099      | 430,5    | 90,8                                 |
